# Supplementary material
Source: Springer Nature journal article supplement (https://www.springermedizin.de/resource/supplementary/12906_2009_251_MOESM3_ESM.pdf/9524364)

Insulin Signal  
Proteins

Saline

Pred.+EA

Pred.+non-EA

IRS1

GLUT4

Actin

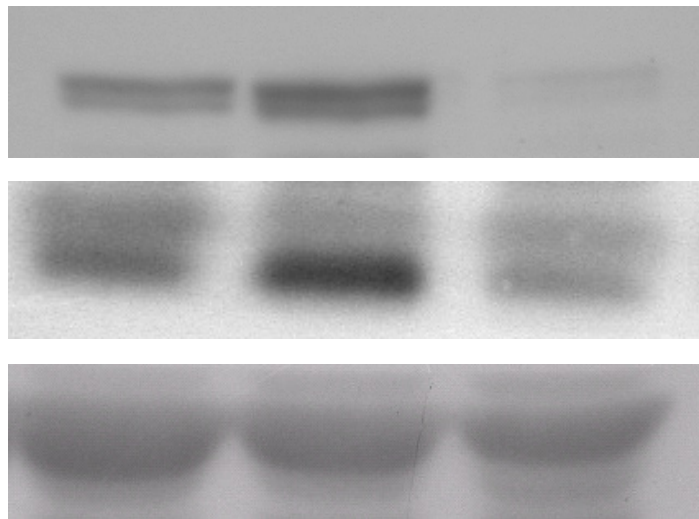

(A)

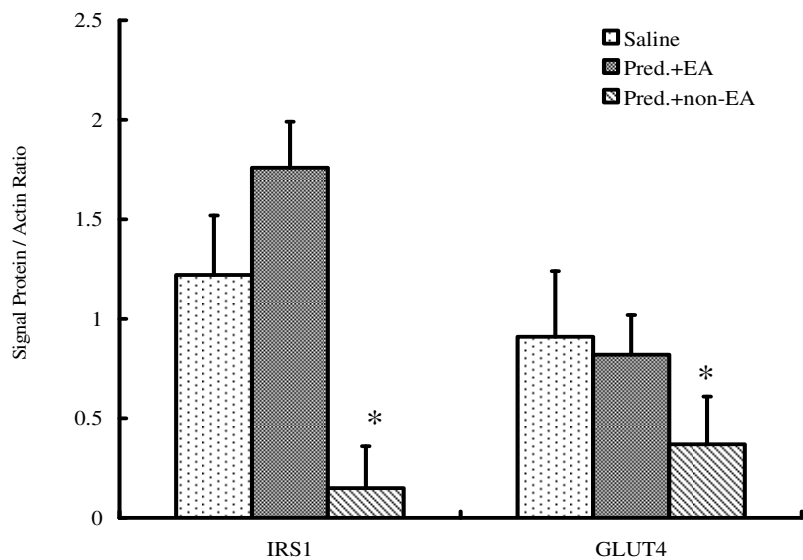

(B)

Supplement: MOESM3 [file 9524364]
